# Supplementary material
Source: PubMed Central journal article supplement (PMC3069182)
Supplement: 1102033108_pnas.1102033108_SI.pdf [file 1102033108_pnas.1102033108_SI.pdf]

# Supporting Information

Lin and Ganem 10.1073/pnas.1102033108

## SI Text

**SI Methods. Cell lines and culture conditions.** HEK 293 cells (CRL-1573) obtained from American Type Culture Collection (ATCC) were cultivated in Dulbecco's Modified Eagle's Medium (DMEM) high glucose (Invitrogen) with 10% fetal bovine serum (Invitrogen), 2 mM L-glutamine, and antibiotics (100 U/mL penicillin and 100 U/mL streptomycin) at 37°C with 5% CO<sub>2</sub> and split every 2 or 3 d. The body cavity lymphoma cell line BCBL-1 carrying episomal KSHV genome was established and maintained in RPMI1640 (Invitrogen) with 10% fetal bovine serum, 2 mM L-glutamine, 55 μM 2-mercaptoethanol (Invitrogen, 21985023), and antibiotics (100 U/mL penicillin and 100 U/mL streptomycin) at 37°C with 5% CO<sub>2</sub>, and split at a density of 2 × 10<sup>5</sup> cells/mL before cells reached 1 × 10<sup>6</sup> cells/mL (1). To induce productive replication of KSHV genome, BCBL-1 cells were treated with 500 μM sodium-valproate (Sigma, P4543).

**Plasmid constructions. 3'UTR luciferase reporter constructs.** ORF56 and ORF57 3'UTR sequences have been experimentally characterized (2, 3). Other uncharacterized 3'UTRs were cloned according to NCBI's annotations. For ORF6 3'UTR, we used the first canonical AATAAA following the annotated ORF6 coding sequence as the polyadenylation sequence. Candidate 3'UTRs were inserted immediately downstream of Renilla luciferase (Rluc) reporter of psiCHECK2 dual luciferase reporter plasmid (Promega). We PCR amplified 3'UTRs with the following primer pairs: UTR6-F/R (psiCHECK-6.3U), UTR9-F/R (psiCHECK-9.3U), UTR40/41-F/R (psiCHECK-40/41.3U), UTR44-F/R (psiCHECK-44.3U), UTR56-F/R [psiCHECK-56.3Ug (genomic sequence, with an intron) and psiCHECK-56.3U (without an intron)], UTR57-F/UTR56-R (psiCHECK-57.3U), and UTR59-F/R (psiCHECK-59.3U).

**C-ORF luciferase reporter constructs.** We extended Rluc ORF to cover miR-K5 target site, originally situated in ORF56 3'UTR. To do so, we abolished three stop codons in the region between the Rluc stop codon and miR-K5 site of psiCHECK-56.3U by changing only three nucleotides using primers CORF1-F and CORF2-F.

**N-ORF luciferase reporter constructs.** To generate N-ORF constructs expressing MYC-ORF57-Rluc fusion proteins, we first replaced the starting methionine (ATG) of Rluc ORF of psiCHECK2 with Leucine (TTG) using a primer pair of Rluc (A1T)-F/R. This replacement prevents initiation of translation from Rluc ORF. The modified Rluc ORF was named Rluc (A1T). Next, a fragment with a MYC tag followed by nucleotides 1-103 of ORF57 cDNA was PCR amplified using primers NORF-F and NORF-R and in-frame inserted into NheI site immediately upstream of the Rluc(A1T).

**Genomic DNA expression constructs.** Our experiments suggest that miR-K5 and miR-K6-3p affect CMV (Cytomegalovirus) and EF-1α promoter activity. To use SV40 promoter for expressing ORF57 and ORF56 protein, we replaced Rluc of psiCHECK2 with ORF57 and ORF56 genomic locus consisting of sequences from the starting methionine of ORF to the polyadenylation sequence, AATAAA. For MYC-57 construct, ORF57 genomic locus was PCR amplified with a MYC tag at its N terminus using a primer pair of MYC57-F/R, digested with XbaI and NotI, and cloned into NheI and NotI sites of psiCHECK2.

3FLAG-56 constructs were assembled as described below. First, ORF56 coding sequence, PCR amplified from genomic DNA using primers 56-F and 56-R, was cloned into NotI and EcoRI sites of p3xFLAG-CMV10 (Sigma). Next, a 3FLAG-ORF56 fragment flanking with AvrII and XhoI sites, amplified using primers 3FLAG56-F and 3FLAG56-R, was cloned into NheI and XhoI sites of psiCHECK2. This resulting construct was cut by XhoI and PmeI and then ligated with ORF56 3'UTR genomic sequence, released from aforementioned psiCHECK2-56.3Ug using XhoI and PmeI.

**Mutagenesis.** Potential miRNA target site mutants, 56-MUT1 (tk5), 56-MUT2, 56-MUT3 (tk6-3p), and 56-MUT4, were introduced by the following primer pairs: 56-MUT1-F/R, 56-MUT2-F/R, 56-MUT3-F/R, and 56-MUT4-F/R, respectively.

**Western blotting.** Proteins were resolved in 10% Tris-HCl SDS-PAGE gels (BioRad) and electotransferred onto PVDF membranes (Immobilon-P, Millipore). The membranes were blocked with 10% nonfat dry milk (BioRad) in TBST20 (20 mM Tris-HCl, pH7.5, 137 mM NaCl, and 0.1% Tween 20) at room temperature for 1 h. Primary mouse anti-FLAG M2 (diluted 1:1,000; Sigma, F1804), mouse anti-c-MYC (9E10) (diluted 1:500; Santa Cruz Biotechnology, SC-40), or goat antifirefly luciferase (diluted 1:1,000; Promega, G745A) was applied in TBST20 with 2% nonfat dry milk over night at 4°C. Blots were washed extensively in TBST20 and incubated with goat anti-mouse IgG horseradish peroxidase (HRP) conjugate (diluted 1:3,000; BioRad, 170-6,516) or donkey anti-goat IgG HRP conjugate (diluted 1:5,000; Santa Cruz Biotechnology, SC-2020) in TBST20 for 1 h at room temperature. After extensive wash in TBST20, blots were visualized using Amersham ECL Western Blotting Detection Reagents (GE Healthcare) followed by exposure to Amersham Hyperfilm ECL (GE Healthcare).

**RNA isolation and RT-PCR.** Total RNA from BCBL-1 and HEK293 mock transfected or transfected with 3FLAG-56 or MYC-57 (1.0 μg plasmid and 5 μL Lipofectamine 2000 used in a 6-well format for 24 h transfection) was extracted using RNeasy mini kit with on-column DNase I digestion (Qiagen). A second DNase treatment by TURBO DNA-free kit (Applied Biosystems) was carried out to remove trace amounts of contaminated genomic DNA. Recovered RNA was quantified using a NanoDrop ND-1000 spectrophotometer (NanoDrop Technologies). An equal amount of RNA (200 ng) was reverse transcribed in the presence (+RT) or absence (-RT) of MultiScribe reverse transcriptase using High Capacity cDNA RT Kit (Applied Biosystems). One-tenth of the reverse transcription reaction (+RT or -RT) was used as a template for Platinum Taq PCR (Invitrogen) using primer 56 (RT56-F and RT56/57-R) and primer 57 (RT57-F and RT56/57-R). One-tenth of PCR products were separated in 1.5% agarose gels.

**Mature KSHV miRNA sequences and oligonucleotides.** Mature miRNA sequences. The seed of miRNA (nucleotides 2-8) is underlined.

miR-K1: AUUACAGGAAACUGGGUGUAAGC

miR-K2: AACUGUAGUCCGGGUCGAUCUG

miR-K3-5p: UCACAUUCUGAGGACGGCAGCGA

miR-K3-3p: UCGCGGUCACAGAAUGUGACA

miR-K4-5p: AGCUAAACCGCAGUACUCUAGG
